# Supplementary material
Source: PubMed Central journal article supplement (PMC9949370)
Supplement: mat-69-254-s002.pdf [file mat-69-254-s002.pdf]

Supplemental Table 1: Characteristics of survivors and non-survivors in COVID-19 patients receiving ECMO

|                                     | Survivors<br>(n=21) | Non-survivors<br>(n=27) | p-value |
|-------------------------------------|---------------------|-------------------------|---------|
| Age, years                          | 47 (38-53)          | 51 (44-55)              | 0.32    |
| Body-mass index, kg/m <sup>2</sup>  | 32.5 (30.9-39.4)    | 34.1 (29-36.8)          | 0.43    |
| Sex                                 |                     |                         |         |
| Male                                | 13 (62%)            | 22 (81%)                | 0.19    |
| Female                              | 8 (38%)             | 5 (19%)                 |         |
| Race                                |                     |                         |         |
| African American                    | 8 (38%)             | 7 (26%)                 | 0.53    |
| Asian                               | 0 (0%)              | 2 (7%)                  | 0.50    |
| Hispanic                            | 9 (43%)             | 7 (26%)                 | 0.24    |
| White                               | 4 (19%)             | 11 (41%)                | 0.13    |
| Pre-existing comorbidities          |                     |                         |         |
| Hypertension                        | 6 (29%)             | 11 (41%)                | 0.54    |
| Hyperlipidemia                      | 2 (10%)             | 8 (30%)                 | 0.15    |
| Diabetes                            | 7 (33%)             | 7 (26%)                 | 0.75    |
| Coronary artery disease             | 0 (0%)              | 3 (11%)                 | 0.25    |
| Tobacco use                         | 1 (5%)              | 0 (0%)                  | 0.48    |
| Malnutrition                        | 1 (5%)              | 8 (30%)                 | 0.05*   |
| Management strategies               |                     |                         |         |
| Non-invasive ventilation time, days | 3.6 ± 4.5           | 5.6 ± 5.0               | 0.16    |
| Pre-ECMO ventilation time, days     | 4.3 ± 3.2           | 4.6 ± 2.9               | 0.70    |
| Diagnosis to cannulation time, days | 11.1 ± 6.5          | 15.4 ± 4.7              | 0.02*   |
| Remdesivir                          | 12 (57%)            | 21 (78%)                | 0.21    |
| Glucocorticoids                     | 13 (62%)            | 23 (85%)                | 0.10    |
| Complications                       |                     |                         |         |
| Acute kidney injury                 | 7 (33%)             | 10 (37%)                | 0.52    |
| Bleeding sequelae                   | 15 (71%)            | 24 (89%)                | 0.15    |
| Thrombosis                          | 9 (43%)             | 5 (19%)                 | 0.11    |
| Secondary infection                 | 18 (86%)            | 21 (78%)                | 0.71    |
| ECMO time, days                     | 30.3 ± 18.2         | 52.6 ± 34.6             | <0.01*  |

Continuous variables are presented as mean  $\pm$  SD or median (IQR). Categorical variables are presented as n(%). \*p-value  $\leq$ 0.05.

OR= 1.10  
p=0.039
